# Supplementary material for: Alterations of androgen receptor-regulated enhancer RNAs (eRNAs) contribute to enzalutamide resistance in castration-resistant prostate cancer
Source: PubMed Central journal article supplement (PMC5122410; doi:10.18632/oncotarget.9535), 2016-05-21
Supplement: oncotarget-07-38551-s001.pdf [file oncotarget-07-38551-s001.pdf]

**SUPPLEMENTARY TABLE****Supplementary Table S1: Information of the primers used**

| <b>RT-qPCR eRNA primers</b>     |                                    |
|---------------------------------|------------------------------------|
| <i>NCAM2</i> Forward            | ATC CTT CCG GTT GCA GAC AC         |
| <i>NCAM2</i> Reverse            | AGT GGC ACT CGC CAG TAT TA         |
| <i>FTO</i> Forward              | AGG GAA CCA GAA CAC AAC CAA T      |
| <i>FTO</i> Reverse              | AAA CCC CAG CCA ATG AAA ATG G      |
| <i>MARC1</i> Forward            | GAG CCA CGG AAG GTT TGT GA         |
| <i>MARC1</i> Reverse            | TCC TCA TTC CGA CTG TCA CG         |
| <i>LUZP2</i> Forward            | TCT GGA AAG CAC AGC ACG TC         |
| <i>LUZP2</i> Reverse            | GAT TGT TCT CTT GCG GTG CAG        |
| <b>RT-qPCR mRNA primers</b>     |                                    |
| <i>NCAM2</i> Forward            | TGA GCC TCC TCC TCT CCT TC         |
| <i>NCAM2</i> Reverse            | CAC CAA TCG CTG TAC ATG TG         |
| <i>FTO</i> Forward              | TAG CTG TGA AGG CCC TGA AGA        |
| <i>FTO</i> Reverse              | GTT GTG AAC CGG CCA AAA CA         |
| <i>MARC1</i> Forward            | AGC AGA CTT GTT CCG ACC CA         |
| <i>MARC1</i> Reverse            | TCC CAA GAA TCC TCT GCA TAG AC     |
| <i>LUZP2</i> Forward            | AGC ACC AGA CAG GAC TAT GAA GA     |
| <i>LUZP2</i> Reverse            | TTT TGG CAG ACT GCT CAT CGT TT     |
| <b>3C Assay Primers</b>         |                                    |
| <i>MARC1</i> Promoter Forward 1 | GTG CCT GCA GGA CCA AGT GAC        |
| <i>MARC1</i> Control Forward 2  | TCG GCA GAC TGC GGA AAG G          |
| <i>MARC1</i> Enhancer Forward 3 | GCT GGG CAG GCT GTT CAC TG         |
| <i>MARC1</i> Promoter Reverse 1 | CAG AGT TCT CCC GGC GGC            |
| <i>LUZP2</i> Promoter Forward 1 | GCC CAA GGG GCT AAT ATT CAC T      |
| <i>LUZP2</i> Control Forward 2  | TCT CAA AGG CAT GAC TTT CAG TCC    |
| <i>LUZP2</i> Enhancer Forward 3 | GTG GGA AAG CCA AAT ATG TGC TCT C  |
| <i>LUZP2</i> Promoter Reverse 1 | CGG GGG CAA GCT CTT TAC AG         |
| <i>NCAM2</i> Promoter Forward 1 | CTA CTC CGG AAC TCA TAC CCT TTG C  |
| <i>NCAM2</i> Control Forward 2  | CCC TCA CTG TTC TAC TAT GCT G      |
| <i>NCAM2</i> Enhancer Forward 3 | GTG AGC CAC TGC GCC CAG            |
| <i>NCAM2</i> Promoter Reverse 1 | AAT TCT CAT TCA GTG ACA CAT CTC TG |
| <b>AR ChIP primers</b>          |                                    |
| <i>NCAM2</i> Forward            | TC CTT CCG GTT GCA GAC AC          |
| <i>NCAM2</i> Reverse            | GT GGC ACT CGC CAG TAT T           |
| <i>FTO</i> Forward              | GG GAA CCA GAA CAC AAC CA          |
| <i>FTO</i> Reverse              | CCC CAG CCA ATG AAA ATG G          |
| <i>MARC1</i> Forward            | GAG CCA CGG AAG GTT TGT G          |
| <i>MARC1</i> Reverse            | CC TCA TTC CGA CTG TCA CG          |
| <i>LUZP2</i> Forward            | CT GGA AAG CAC AGC ACG TC          |
| <i>LUZP2</i> Reverse            | T TGT TCT CTT GCG GTG CAG          |
